# Supplementary material for: Small Molecule BRD4 Inhibitors Apabetalone and JQ1 Rescues Endothelial Cells Dysfunction, Protects Monolayer Integrity and Reduces Midkine Expression
Source: MDPI journal article supplement (doi:10.3390/molecules27217453), 2022-11-02
Supplement: s1 [file s1]

## Supplementary Figures

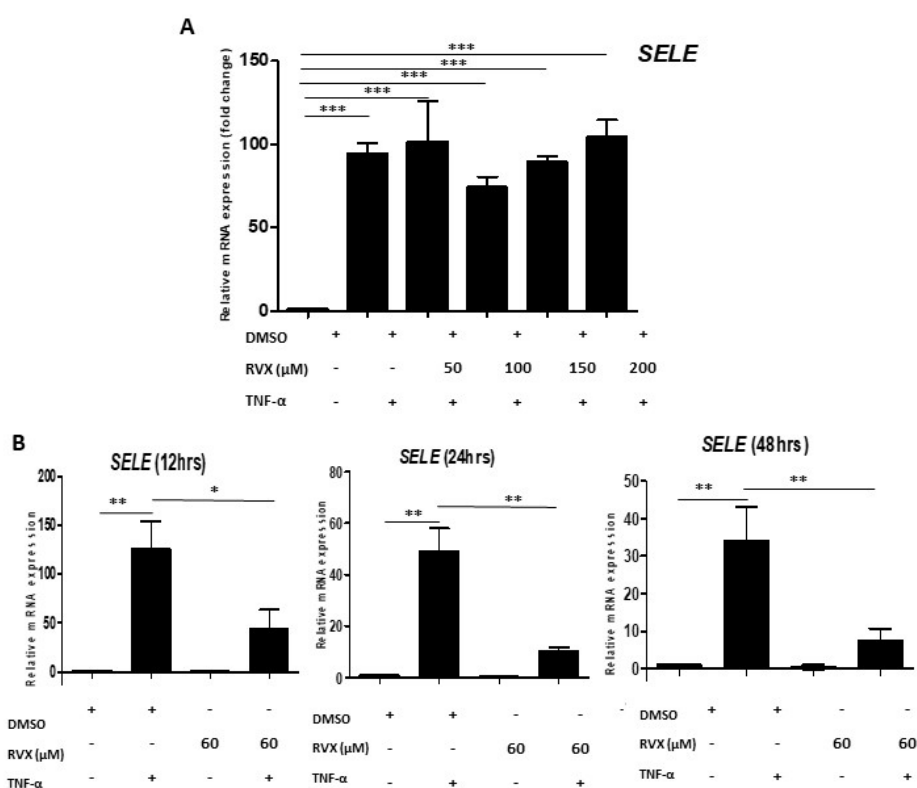

**Figure S1.** Optimization of Inhibition of BRD4 function. **A.** bar graph showing relative mRNA levels of SELE after normalization to house-keeping gene GAPDH in DMSO (control), TNF- $\alpha$  treatment, RVX208 (50-, 100-, 150-, and 200  $\mu$ M) for four hours followed by TNF- $\alpha$  treatment. **B.** bar graph showing relative mRNA levels of SELE after normalization to house-keeping gene GAPDH, in DMSO control, TNF- $\alpha$ -only, RVX208-only 60  $\mu$ M (12 hrs to 48 hrs), and RVX208 (60  $\mu$ M) followed by TNF- $\alpha$  treatment. A-B. One-way ANOVA with Tukey's post-test was used and treated samples were compared with DMSO treated samples, and values are mean  $\pm$  SD of three biological replicates (\*\*= $p < 0.001$ , \*= $p < 0.01$ , and  $p < 0.05$ )).

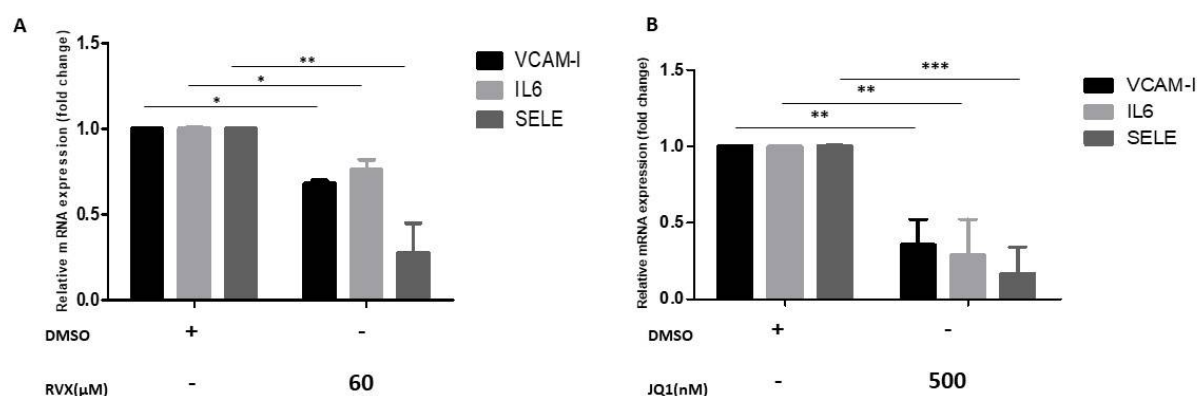

**Figure S2.** BRD4 inhibition using RVX208 and JQ1. **A.** bar graph showing relative mRNA levels of inflammatory markers VCAM-I, IL6, and SELE, in HUVECs, treated with DMSO, and RVX208-only. **B.** Bar graph showing relative mRNA levels of inflammatory markers VCAM-I, IL6, and SELE, in HUVECs, treated with DMSO, and JQ1-only. One-way ANOVA with Tukey's post-test was used. Data are shown after normalization to housekeeping gene GAPDH. Values are mean  $\pm$  SD of three biological replicates (\*\*= $p < 0.001$ , \*= $p < 0.01$ , and  $p < 0.05$ )).

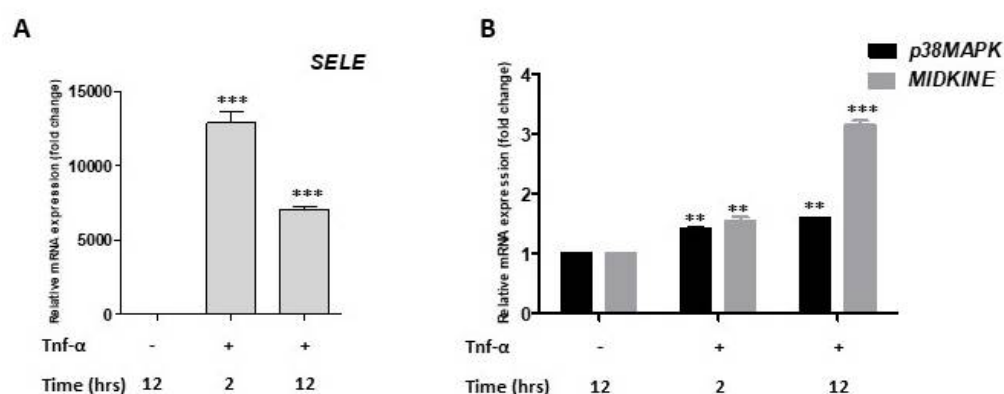

**Figure S3.** Induction of midkine and p38MAPK expression in HUVECs. **A**, Bar graph showing mRNA levels of SELE after normalization to house-keeping gene GAPDH in Control (non-treated) and in TNF- $\alpha$  treated (2hrs and 12hrs) monolayers. **B**, Bar graph showing mRNA levels of p38MAPK and midkine after normalization to house-keeping gene GAPDH in non-treated control and TNF- $\alpha$  treated (2 hrs and 12 hrs) monolayers. One-way ANOVA with Tukey's post-test was used, and values are mean  $\pm$  SD of two biological replicates and asterisks indicate statistical significance of \*\*\*  $p < 0.001$  and, \*\*  $p < 0.01$ .

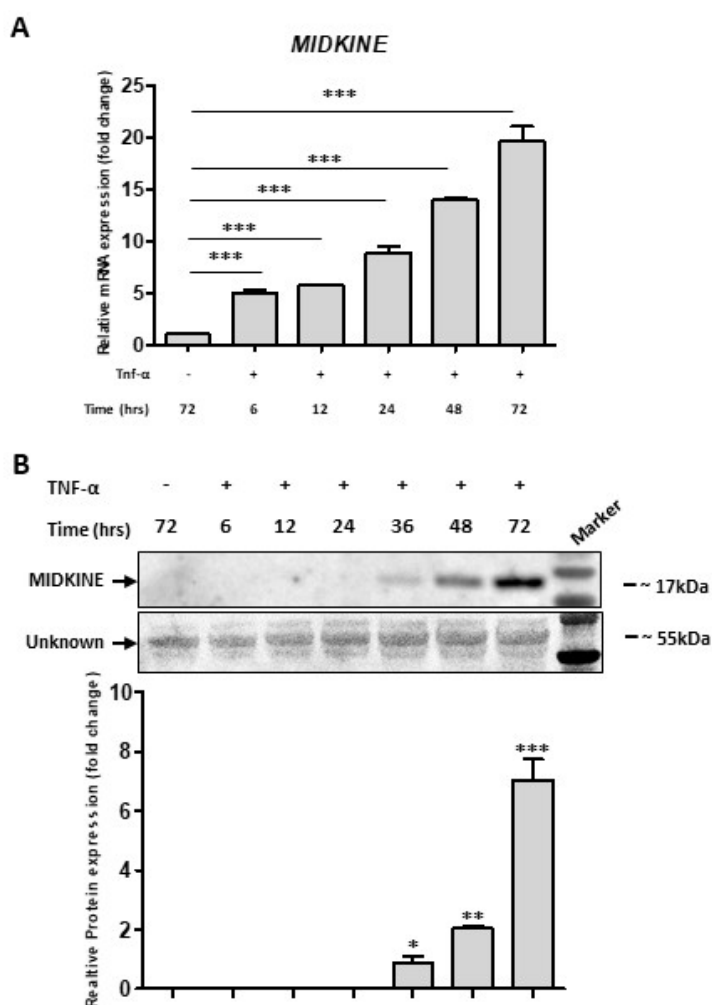

**Figure S4.** Optimization of Midkine expression in HUVEC monolayer during TNF- $\alpha$  treatment: **A**, Bar graph showing relative mRNA levels of midkine after normalization to house-keeping gene, GAPDH, in control and after different times of TNF- $\alpha$  treatments (6-, 12-, 24-, 48- and 72-hrs). **B**, Western blot image (upper panel) and the corresponding relative quantification bar graph showing

the midkine protein expression in cell supernatant (lower panel) in control and TNF- $\alpha$  treatments (6-, 12-, 24-, 36-, 48-, and 72hrs). Ponceau staining of the Western blot membrane shows a band of unknown identity at ~55 kDa as a loading control. One-way ANOVA with Tukey's post-test was used, and values are mean  $\pm$  SD of three biological replicates (\*\* =  $p < 0.01$ , \*\*\* =  $p < 0.001$  and \* =  $p < 0.05$ ).

**Table S1.** Primer sequences for Real time PCR.

| No. | Gene               | Primer sequence                                                                        |
|-----|--------------------|----------------------------------------------------------------------------------------|
| 1   | GAPDH              | forward primer 5'TGGGTGTGAACCATGAGAAGTA3'<br>reverse primer 5'GAGTCCTTCCACGATACCAAAG3' |
| 2   | SELE               | forward primer 5'CTCTCCCTCCTGACATTAGCAC3'<br>reverse primer 5'AGGCTTTTGGTAGCTTCCATCT3' |
| 3   | VCAM-I             | forward primer 5'GGAAAAACAGAAAAGAGGTGGA3'<br>reverse primer 5'GCCCATGACACTACATGTCAAC3' |
| 4   | IL6                | forward primer 5'AGTGAGGAACAAGCCAGAGC3'<br>reverse primer 5'GTCAGGGGTGGTTATTGCAT3'     |
| 5   | BRD4-total         | forward primer 5'TCCAACCCTAACAAGCCCAA3'<br>reverse primer 5'GAAAGGCCATGCAAAGTGGT3'     |
| 6   | BRD4-Short isoform | forward primer 5'TCCTCCAAGATGAAGGGCTT3'<br>reverse primer 5'AGCTTGCTGGGAAGGAATCT3'     |
| 7   | BRD4-Long isoform  | forward primer 5'AGCGAAGACTCCGAAACAGA3'<br>reverse primer 5'TCTGCTGATGGTGGTGATGA3'     |
| 8   | MIDKINE            | forward primer 5'ACCAGTGCCTTCTGTCTGCT3'<br>reverse primer 5'ATTGTGGGGAAGAACAAAAGC3'    |
| 9   | P38MAPK            | forward primer 5'TGGTACTGAGCAAAGTAGGCA3'<br>reverse primer 5'TGGGAAATGCAGGGAGTTCT3'    |
